# Supplementary material for: Hypoxia induced exosomal circRNA promotes metastasis of Colorectal Cancer via targeting GEF-H1/RhoA axis
Source: PubMed Central journal article supplement (PMC7381736; doi:10.7150/thno.44419), 2020-07-09
Supplement: thnov10p8211s1.pdf [file thnov10p8211s1.pdf]

**A**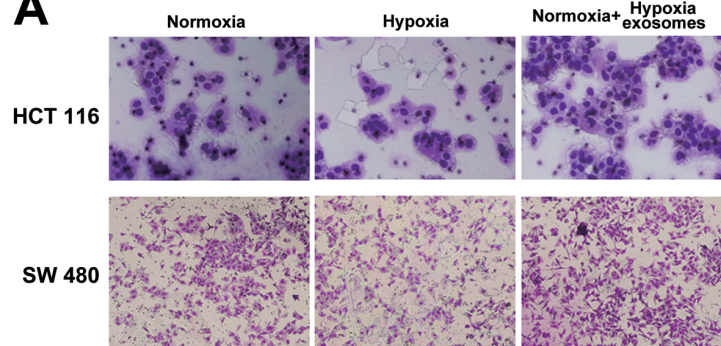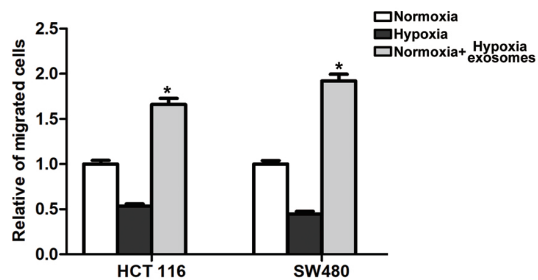**B**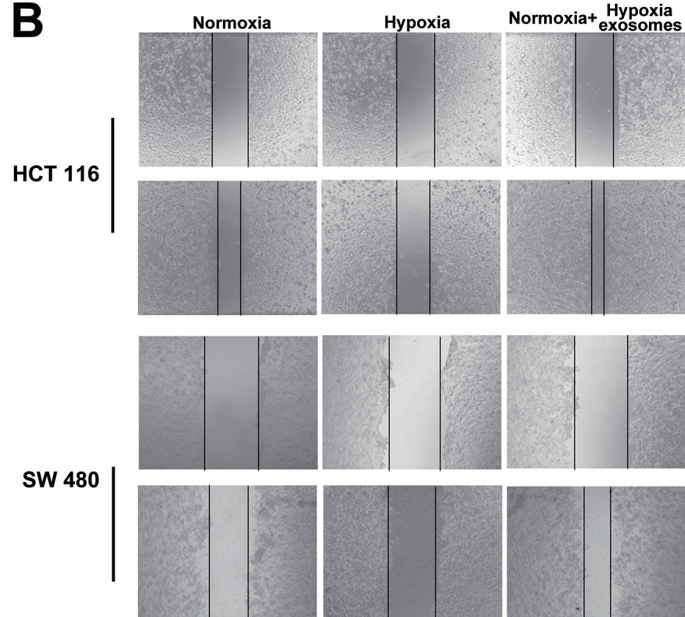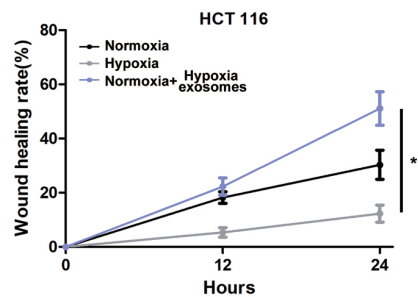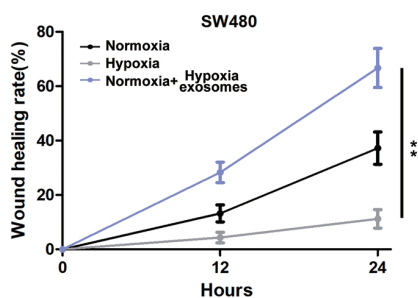**C**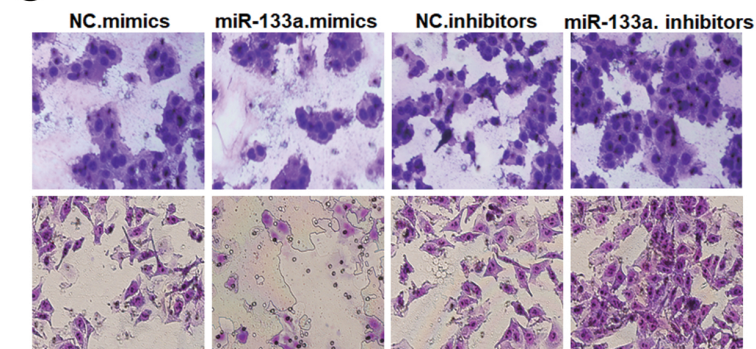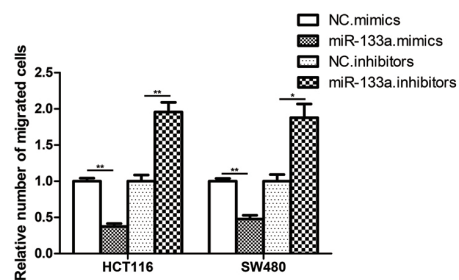**D**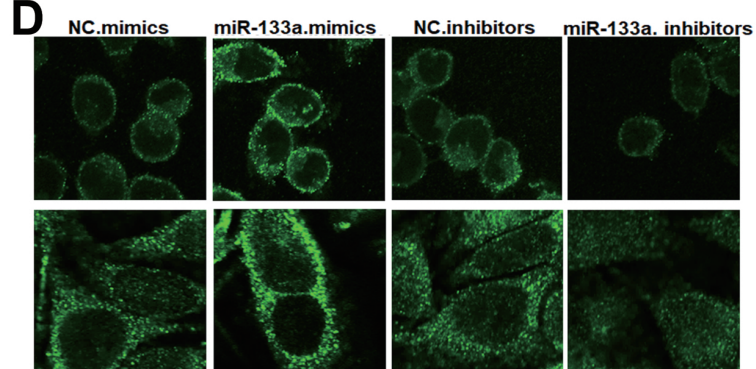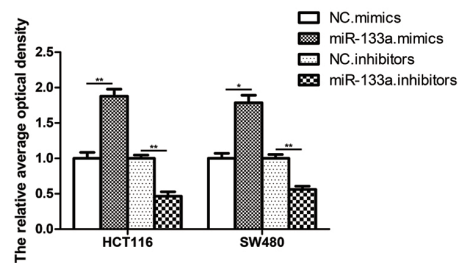

**A**

| Characteristics           | Number of patients (%) n=25 |
|---------------------------|-----------------------------|
| <b>Gender</b>             |                             |
| Male                      | 14(56%)                     |
| Female                    | 11(44%)                     |
| <b>Age</b>                |                             |
| < 60                      | 18(72%)                     |
| ≥60                       | 7(28%)                      |
| <b>Smoking history</b>    |                             |
| No                        | 9(36%)                      |
| Yes                       | 16(64%)                     |
| <b>Drinking history</b>   |                             |
| No                        | 6(24%)                      |
| Yes                       | 19(76%)                     |
| <b>Family History</b>     |                             |
| No                        | 21(84%)                     |
| Yes                       | 4(16%)                      |
| <b>TNM classification</b> |                             |
| I+ II                     | 13(52%)                     |
| III+ IV                   | 12(48%)                     |

**B**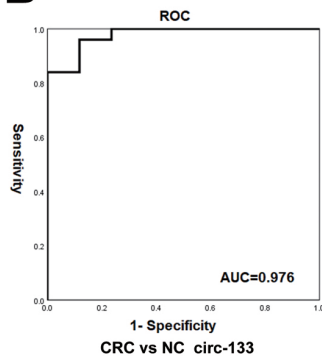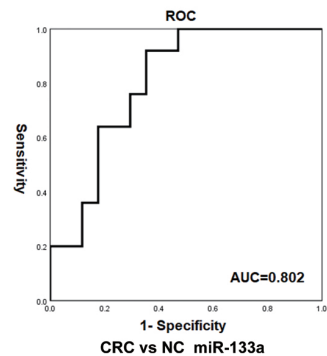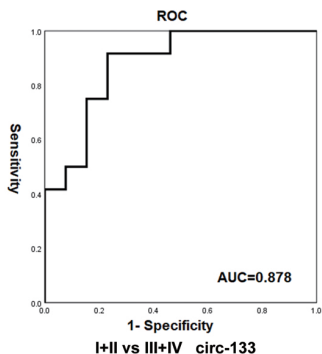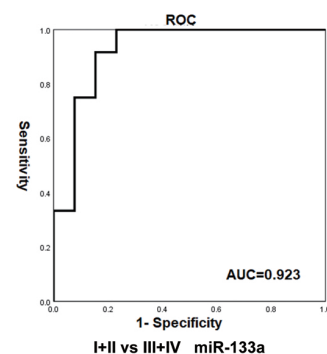**C**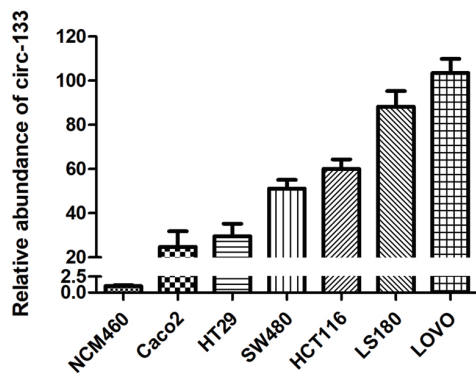

**Fig.S1**

(A) Validation of hypoxic exosomes enhance the migration ability of CRC cells by transwell assays, (n=3). (B) Wound healing assay demonstrated that hypoxic exosomes promote CRC cell migration, (n=3). (C) Transwell assays revealed that down-expression of miR-133a increase CRC cells migration, (n=3). (D) Immunofluorescence assay was used to detect E-cadherin membrane distribution in each treatment group, (n=3).

**Fig.S2**

(A) Basic clinical information of 25 CRC patients. (B) ROC curve according to the result of qRT-PCR. (C) Relative abundance of circ-133 in CRC cell lines, (n=3).
